# Supplementary material for: The influence of hydrogen bonding interactions on the C–H bond activation step in class I ribonucleotide reductasesElectronic supplementary information (ESI) available: Energies and structures of stationary points for studied reactions. See http://www.rsc.org/suppdata/ob/b2/b210536p/
Source: Royal Society of Chemistry journal article supplement (doi:10.1039/b210536p), 2003-01-22
Supplement: tables.doc [file tables.doc]

**Supporting Table 1**. Absolute Energies (-Etot), Energies Corrected to 0K (-E0), and Energies corrected to 298K (-E298) for Stationary Points in the Reaction of the of the Methylthiyl Radical (**8**) with Methanol (**9**) to yield Methanol Radical (**10**) and Methyl Thiol (**11**) [in Hartree].

**8(A') 9 10 11 12 13 14**

**-Etot**

B3LYP/DZP 438.03639 115.74119 115.07842 438.67541 553.783577 553.75245 553.76145

B3LYP/6-311+G(2d,p)//B3LYP/DZP 438.10286 115.76753 115.10472 438.74690 553.87611 553.84900 553.85899

B3LYP/6-311+G(2d,p) 438.10291 115.76762 115.10492 438.74696 553.87628 553.84914 553.85928

BHLYP/DZP 437.980421 115.664932 115.006020 438.613283 553.651548 553.612324 553.626859

BHLYP/6-311+G(2d,p)//BHLYP/DZP 438.054005 115.695793 115.037065 438.692238 553.755786 553.7210938 553.736577

BHLYP/6-311+G(2d,p) 438.054037 115.695858 115.037263 438.692270 553.755922 553.721195 553.736845

CCSD(T)/cc-pVTZ//B3LYP/6-311+G(2d,p) 437.525877 115.55070 114.888002 438.168913 553.083825 553.052105 553.065177

**-E0**

B3LYP/DZP 438.00073 115.68982 115.04108 438.62922 553.69445 553.66910 553.67606

B3LYP/6-311+G(2d,p) 438.06759 115.71655 115.06780 438.70116 553.78782 553.76638 553.77459

BHLYP/DZP 437.943303 115.611523 114.967220 438.565338 553.558813 553.525951 553.538265

BHLYP/6-311+G(2d,p) 438.017414 115.642875 114.998766 438.644872 553.664059 553.635517 553.649283

**-E298**

B3LYP/DZP 437.99753 115.68650 115.03778 438.62563 553.68627 553.66211 553.66779

B3LYP/6-311+G(2d,p) 438.06438 115.71319 115.06442 438.69753 553.77967 553.75933 553.76620

BHLYP/DZP 437.940153 115.608232 114.963950 438.561805 553.550746 553.519058 553.530024

BHLYP/6-311+G(2d,p) 438.014245 115.639541 114.995432 438.641299 553.655054 553.627612 553.640866

**Supporting Table 2**. Absolute Energies (-Etot), Energies Corrected to 0K (-E0), and Energies corrected to 298K (-E298) for Stationary Points in the Reaction of Methylthiyl Radical (**8**) with 3,4-Dihydroxytetrahydrofuran (**7**) to yield 3,4-Dihydroxytetrahydrofuran-3-yl Radical (**15**) and Methyl Thiol (**11**) [in Hartree].

**7** **15 16a** **16b 17a** **17b 18a** **18b**

**-Etot**

B3LYP/DZP 382.941176 382.283103 820.9810755 820.983264 820.955515 820.951559 820.9608288 820.9631905

B3LYP/6-311+G(2d,p)//B3LYP/DZP 383.01261 382.3545097 821.118289 821.1214587 821.0971857 821.094028 821.1034979 821.1066045

BHLYP/DZP 382.710227 382.055108 820.6951019 820.6970913 820.6603922 820.657734 820.6713663 820.67405525

BHLYP/6-311+G(2d,p)//BHLYP/DZP 382.796868 382.1415373 820.8547802 820.8574127 820.8246265 820.822446 820.8364203 820.83950289

**-E0**

B3LYP/DZP 382.814498 382.170321 820.816759 820.819385 820.797675 820.794702 820.800842 820.803348

BHLYP/DZP 382.578193 381.937335 820.523998 820.526327 820.496102 820.494333 820.504670 820.507279

**-E298**

B3LYP/DZP 382.807938 382.163416 820.805071 820.807520 820.786553 820.783073 820.788289 820.790841

BHLYP/DZP 382.571763 381.930604 820.512530 820.514653 820.485167 820.482054 820.492330 820.495035

**Supporting Table 3**. Absolute Energies (-Etot), Energies Corrected to 0K (-E0), and Energies corrected to 298K (-E298) for Stationary Points in the Reaction of Methylthiyl Radical (**8**) with complex **19** to yield product radical **20** and Methyl Thiol (**11**) [in Hartree].

**19** **20 21a 22a 23a 21b 22b 23b**

**-Etot**

BHLYP/DZP 611.186396 610.537378 1049.178376 1049.154384 1049.161830 1049.172398 1049.142812 1049.1503036

BHLYP/6-311+G(2d,p)// 611.320612 610.672165 1049.385671 1049.366328 1049.374597 1049.379814 1049.355628 1049.3635762

BHLYP/DZP

**-E0**

BHLYP/DZP 611.001882 610.366997 1048.955035 1048.937329 1048.942184 1048.949603 1048.927443 1048.931887

**-E298**

BHLYP/DZP 611.989953 610.354927 1048.938087 1048.921168 1048.924791 1048.933337 1048.911150 1048.914282

**Supporting Table 4**. Absolute Energies (-Etot), Energies Corrected to 0K (-E0), and Energies corrected to 298K (-E298) for Stationary Points in the Reaction of Methylthiyl Radical (**8**) with complex **24** to yield Product Radical **28** and Methyl Thiol (**11**) [in Hartree].

**-Etot** **-Etot -E0 -E298**

BHLYP/DZP BHLYP/6-311+G(2d,p)//BHLYP/DZP BHLYP/DZP

BHLYP/DZP

**24** 591.84518256 591.98250931 591.633781 591.621357

**25a** 1029.8307397 1030.0412616 1029.580033 1029.562688

**25b** 1029.8270511 1030.0375708 1029.577413 1029.559441

**26a** 1029.797618 1030.0126527 1029.554154 1029.537192

**26b** 1029.7971782 1030.0129210 1029.554306 1029.537009

**27a** 1029.8090617 1030.0253593 1029.563452 1029.545975

**27b** 1029.8053881 1030.0217248 1029.559880 1029.541368

**28** 591.1917158 591.32941583 590.995041 590.982192
